# Supplementary material for: Fly ash upcycling to functional silica nanomaterials: insights into synthetic strategies towards efficient adsorbents for water purification
Source: Royal Society of Chemistry journal article supplement (doi:10.1039/d5ra08626d), 2026-01-01
Supplement: d5ra08626d1.pdf [file d5ra08626d1.pdf]

## Supplementary Information

### **Fly Ash Upcycling to Functional Silica Nanomaterials: Insights into Synthetic Strategies towards Efficient adsorbents for Water Purification**

Miguel S. Ruiz<sup>a</sup>, Cristian Tunsu<sup>b</sup>, Fredric. G. Svensson<sup>c</sup>, Ani Vardanyan<sup>\*a</sup>

<sup>a</sup> Department of Molecular Sciences, Swedish University of Agricultural Sciences, P.O. Box 7015, 75007 Uppsala, Sweden

<sup>b</sup> EasyMining Services AB, Ultunaallén 2A, 756 51 Uppsala, Sweden

<sup>c</sup> Department of Materials Science and Engineering, The Ångström Laboratory, Uppsala University, Uppsala Box 35, 751 03, Sweden.

\*Corresponding author-Dr. Ani Vardanyan, [ani.vardanyan@slu.se](mailto:ani.vardanyan@slu.se), Department of Molecular Sciences, Swedish University of Agricultural Sciences, P.O. Box 7015, 75007 Uppsala, Sweden

**Table S1.** Elemental analysis of FA. The sample underwent microwave-assisted digestion in a mixture of nitric acid, hydrochloric acid, and hydrofluoric acid at elevated temperature. The total element content in the solution was then measured with Inductively Coupled Plasma Sector Field Mass Spectrometry (ICP-SFMS; Thermo Scientific Element XR)

| <b>Element</b> | <b>Amount<br/>(mg/kg dry FA)</b> |
|----------------|----------------------------------|
| <b>Al</b>      | 31900                            |
| <b>As</b>      | 16.6                             |
| <b>Ba</b>      | 984                              |
| <b>Be</b>      | 1.16                             |
| <b>Ca</b>      | 89700                            |
| <b>Cd</b>      | 2.55                             |
| <b>Co</b>      | 16.4                             |
| <b>Cr</b>      | 99.6                             |
| <b>Cu</b>      | 663                              |
| <b>Fe</b>      | 99600                            |
| <b>Hg</b>      | 0.0536                           |
| <b>K</b>       | 15200                            |
| <b>Mg</b>      | 21700                            |
| <b>Mn</b>      | 566                              |
| <b>Mo</b>      | 8.09                             |
| <b>Na</b>      | 7460                             |
| <b>Nb</b>      | 7.72                             |
| <b>Ni</b>      | 76.3                             |
| <b>P</b>       | 85000                            |
| <b>Pb</b>      | 142                              |
| <b>S</b>       | 3300                             |
| <b>Sb</b>      | 9.72                             |
| <b>Sc</b>      | 4.77                             |
| <b>Si</b>      | 165000                           |
| <b>Sn</b>      | 49.7                             |
| <b>Sr</b>      | 1510                             |
| <b>Ti</b>      | 4920                             |
| <b>V</b>       | 62.2                             |
| <b>W</b>       | 18.9                             |
| <b>Y</b>       | 15.3                             |
| <b>Zn</b>      | 2600                             |
| <b>Zr</b>      | 148                              |
| LOI 1000°C     | 1.52 %                           |

**Table S2.** Elemental analysis of FA residue after acid treatment. The sample underwent microwave-assisted digestion in a mixture of nitric acid, hydrochloric acid, and hydrofluoric acid at elevated temperature. The total element content in the solution was then measured with Inductively Coupled Plasma Sector Field Mass Spectrometry (ICP-SFMS; Thermo Scientific Element XR)

| <b>Element</b> | <b>Amount<br/>(mg/kg dry FA)</b> |
|----------------|----------------------------------|
| <b>Al</b>      | 38400                            |
| <b>As</b>      | 3.16                             |
| <b>Ba</b>      | 2350                             |
| <b>Be</b>      | 1.08                             |
| <b>Ca</b>      | 33400                            |
| <b>Cd</b>      | 0.145                            |
| <b>Co</b>      | 4.1                              |
| <b>Cr</b>      | 123                              |
| <b>Cu</b>      | 132                              |
| <b>Fe</b>      | 15800                            |
| <b>Hg</b>      | <0.05                            |
| <b>K</b>       | 21900                            |
| <b>Mg</b>      | 3550                             |
| <b>Mn</b>      | 119                              |
| <b>Mo</b>      | 1.66                             |
| <b>Na</b>      | 8850                             |
| <b>Nb</b>      | 14.4                             |
| <b>Ni</b>      | 20.2                             |
| <b>P</b>       | 7810                             |
| <b>Pb</b>      | 47.2                             |
| <b>S</b>       | 1620                             |
| <b>Sb</b>      | 9.15                             |
| <b>Sc</b>      | 2.79                             |
| <b>Si</b>      | 343000                           |
| <b>Sn</b>      | 19.4                             |
| <b>Sr</b>      | 550                              |
| <b>Ti</b>      | 9350                             |
| <b>V</b>       | 37                               |
| <b>W</b>       | 19                               |
| <b>Y</b>       | 9.67                             |
| <b>Zn</b>      | 316                              |
| <b>Zr</b>      | 238                              |
| LOI 1000°C     | 2.84 %                           |

**Table S3.** FA composition before and after Si extraction measured by EDS analysis

| Element | FA       | Si extracted FA |
|---------|----------|-----------------|
|         | Atomic % | Atomic %        |
| O       | 58.88    | 57.12           |
| Si      | 17.96    | 7.63            |
| K       | 0.99     | 0.69            |
| Ti      | 0.74     | 1.22            |
| Fe      | 0.68     | 1.12            |
| P       | 0.55     | 0.02            |
| Na      | 0.48     | 13.47           |
| Mg      | 0.30     | 0.19            |
| Al      | 2.41     | 1.67            |
| Ca      | 0.14     | 0.14            |
| C       | 15.03    | 15.86           |
| N       | 1.71     | 0.85            |
| S       | 0.11     | 0.00            |
| Total   | 100.00   | 100.00          |

**Table S4.** Elemental composition of SSS measured by EDS analysis. The SSS solution was dried on the carbon tape prior the measurement

| Element | SSS solution |
|---------|--------------|
|         | Atomic %     |
| C       | 23.87        |
| O       | 53.80        |
| Na      | 20.54        |
| Si      | 1.29         |
| P       | 0.15         |
| N       | 0.34         |
| Total   | 100.00       |

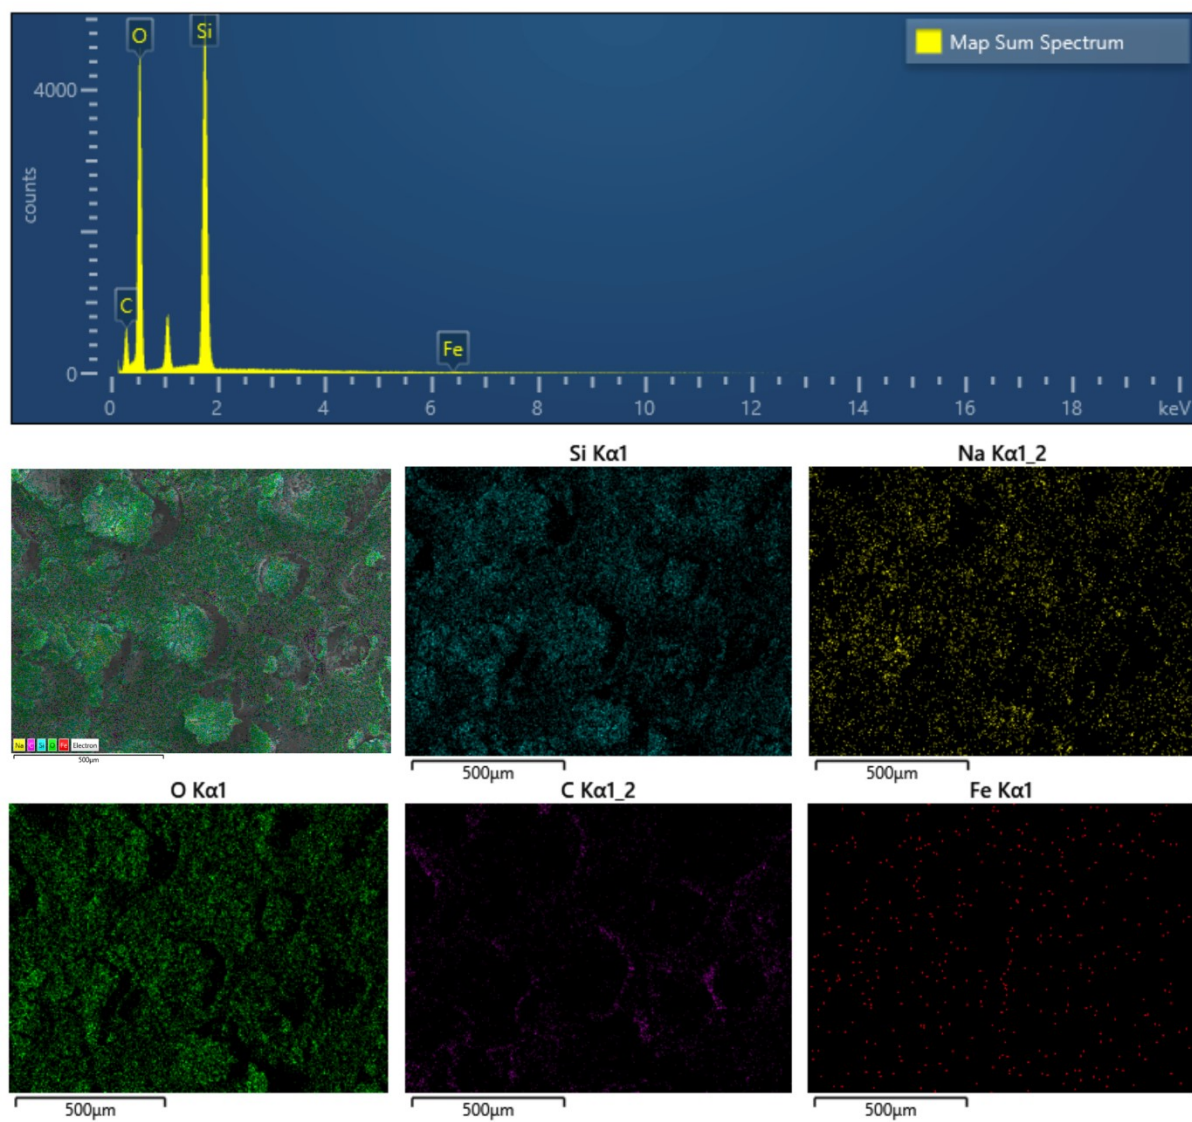

**Fig. S1** EDS analysis of dense SiO<sub>2</sub> NPs derived from FA

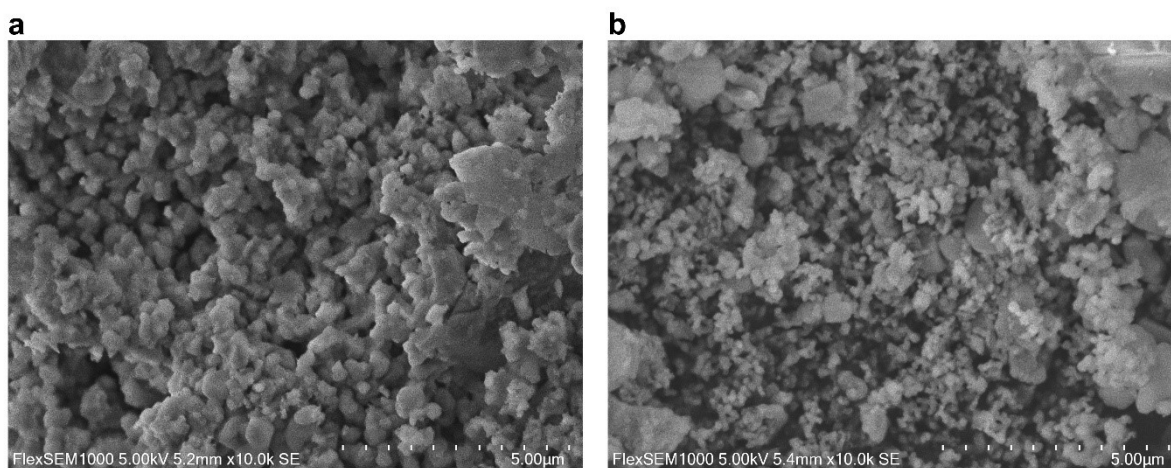

**Fig. S2** SEM images of synthesized  $M\_SiO_2$  NPs (a) and  $1\ pot\_M\_SiO_2$  (b)

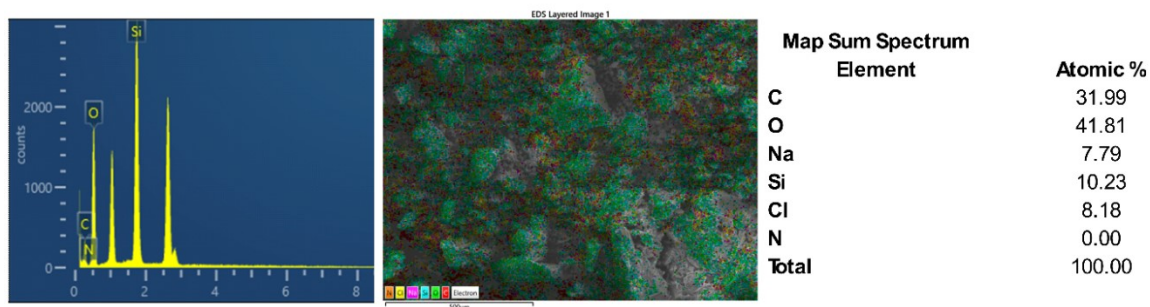

**Fig. S3** EDS analysis of M\_SiO<sub>2</sub> NPs derived from FA

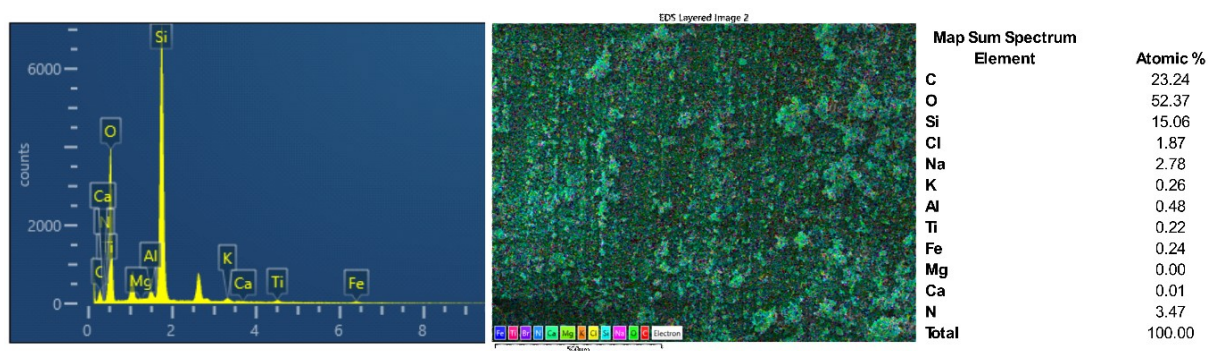

**Fig. S4** EDS analysis of 1 pot\_M\_SiO<sub>2</sub> NPs derived from FA

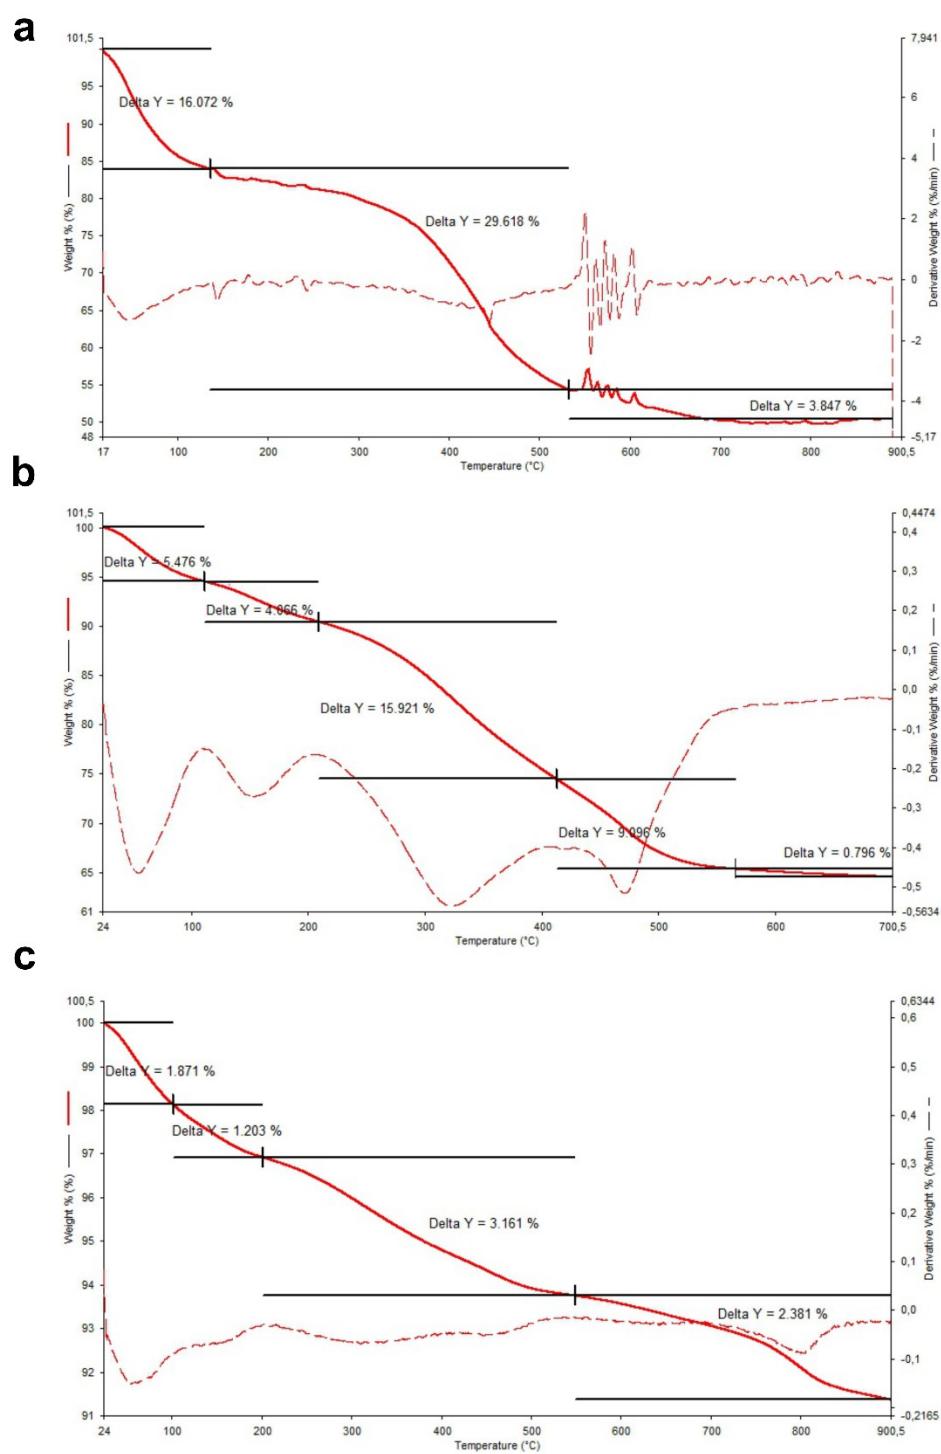

**Fig. S5** TGA curves of synthesized SiO<sub>2</sub> nanomaterials grafted with TMSPDETA ligand: (a) M\_SiO<sub>2</sub>, (b) D\_SiO<sub>2</sub> and (c) 1 pot\_M\_SiO<sub>2</sub> NPs



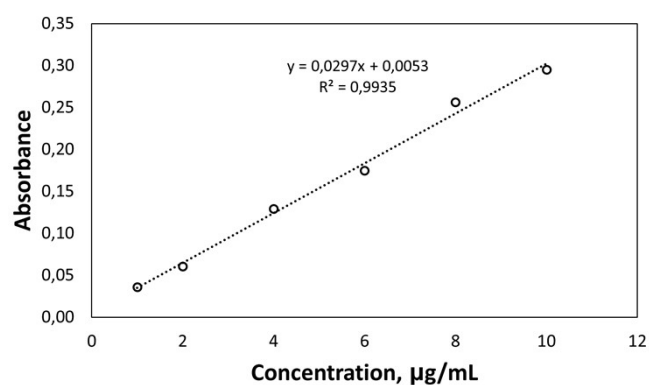

**Fig. S6** Calibration curve DFC measured by UV-Vis with DFC standard concentrations varying between 1-10 µg/mL

**Table S5.** Amount of grafted TMSPDETA ligand on synthesized SiO<sub>2</sub> NPs

| Sample                   | Grafted TMSPDETA (mmol/g) |
|--------------------------|---------------------------|
| D_SiO <sub>2</sub>       | 0.94                      |
| M_SiO <sub>2</sub>       | 1.12                      |
| 1 pot_M_SiO <sub>2</sub> | 0.2                       |

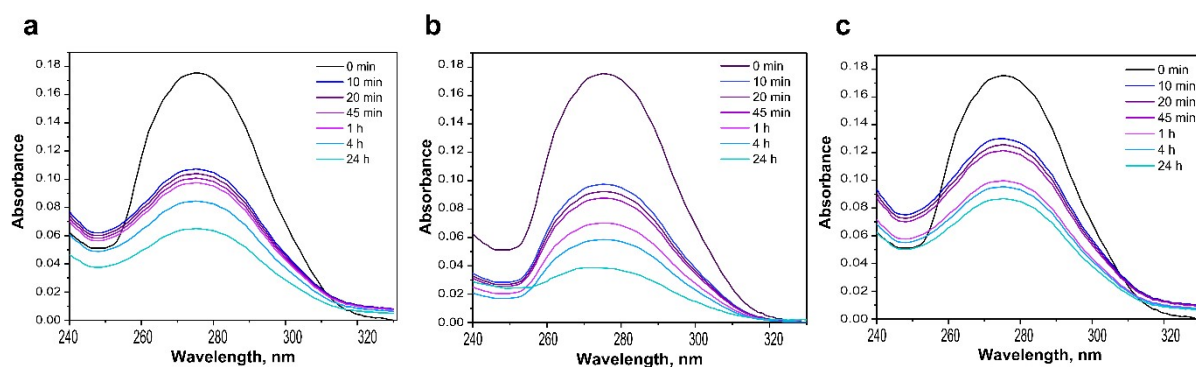

**Fig. S7** Adsorption kinetics of DFC on SiO<sub>2</sub> nanomaterials: (A) D\_SiO<sub>2</sub>, (B) M\_SiO<sub>2</sub> and (C) 1 pot\_M\_SiO<sub>2</sub> NPs
